# Supplementary material for: Scientometrics Evaluation of Published Scientific Papers on the Use of Proteomics Technologies in Mastitis Research in Ruminants
Source: MDPI journal article supplement (doi:10.3390/pathogens13040324), 2024-04-15
Supplement: s1 [file s1]

# Scientometrics Evaluation of Published Scientific Papers on the Use of Proteomics Technologies in Mastitis Research

Maria V. Bourganou, Dimitris C. Chatzopoulos, Daphne T. Lianou, George Th. Tsangaris, George C. Fthenakis and Angeliki I. Katsafadou

**Table S1.** Details of a multivariable model employed for evaluation of predictors for yearly citations of papers on mastitis and proteomics.

| Outcome                                               | Variables offered to the multivariable model | Variables required in the final test                                                                                                                                               |
|-------------------------------------------------------|----------------------------------------------|------------------------------------------------------------------------------------------------------------------------------------------------------------------------------------|
| Yearly citations of papers on mastitis and proteomics | $n = 8$                                      | (a) type of paper (original article or review), (b) country of origin of paper, (c) international collaboration in the origin of the article, (d) no. of cited references in paper |

**Table S2.** Number of papers on mastitis and proteomics published annually from 1971 to 2023.

| Year of paper publication     | No. of papers published annually on mastitis | No. of papers published annually on proteomics | No. of papers published annually on mastitis and proteomics |
|-------------------------------|----------------------------------------------|------------------------------------------------|-------------------------------------------------------------|
| 1971-2003                     | 190 (annual mean)                            | 150 (annual mean)                              | 0                                                           |
| 2004                          | 468                                          | 2824                                           | 1                                                           |
| 2005                          | 467                                          | 3356                                           | 1                                                           |
| 2006                          | 510                                          | 4140                                           | 1                                                           |
| 2007                          | 550                                          | 4513                                           | 2                                                           |
| 2008                          | 493                                          | 4873                                           | 2                                                           |
| 2009                          | 620                                          | 5425                                           | 5                                                           |
| 2010                          | 639                                          | 6111                                           | 7                                                           |
| 2011                          | 716                                          | 6445                                           | 9                                                           |
| 2012                          | 798                                          | 7237                                           | 9                                                           |
| 2013                          | 816                                          | 7163                                           | 12                                                          |
| 2014                          | 729                                          | 7269                                           | 10                                                          |
| 2015                          | 831                                          | 7711                                           | 8                                                           |
| 2016                          | 818                                          | 8069                                           | 8                                                           |
| 2017                          | 810                                          | 8177                                           | 6                                                           |
| 2018                          | 945                                          | 8380                                           | 11                                                          |
| 2019                          | 1084                                         | 9682                                           | 15                                                          |
| 2020                          | 1264                                         | 10886                                          | 17                                                          |
| 2021                          | 1384                                         | 12283                                          | 10                                                          |
| 2022                          | 1279                                         | 12362                                          | 15                                                          |
| 2023                          | 1206                                         | 12335                                          | 7                                                           |
| slope $\pm$ s.e.<br>2004-2023 | 46.14 $\pm$ 3.67 <sup>a,b</sup>              | 483.01 $\pm$ 22.90 <sup>a,c</sup>              | 0.65 $\pm$ 0.12 <sup>b,c</sup>                              |
| slope $\pm$ s.e.<br>2017-2023 | 77.00 $\pm$ 24.29 <sup>a,b</sup>             | 822.82 $\pm$ 110.61 <sup>a,c</sup>             | 0.21 $\pm$ 0.87 <sup>b,c</sup>                              |

<sup>a-c</sup>: same letters indicate  $p < 0.0001$  between respective slopes.

**Figure S1.** Proportion of published papers on mastitis and proteomics shown as proportion of all papers on mastitis (left graph) or on proteomics (right graph) (dashed lines indicate respective trendlines).

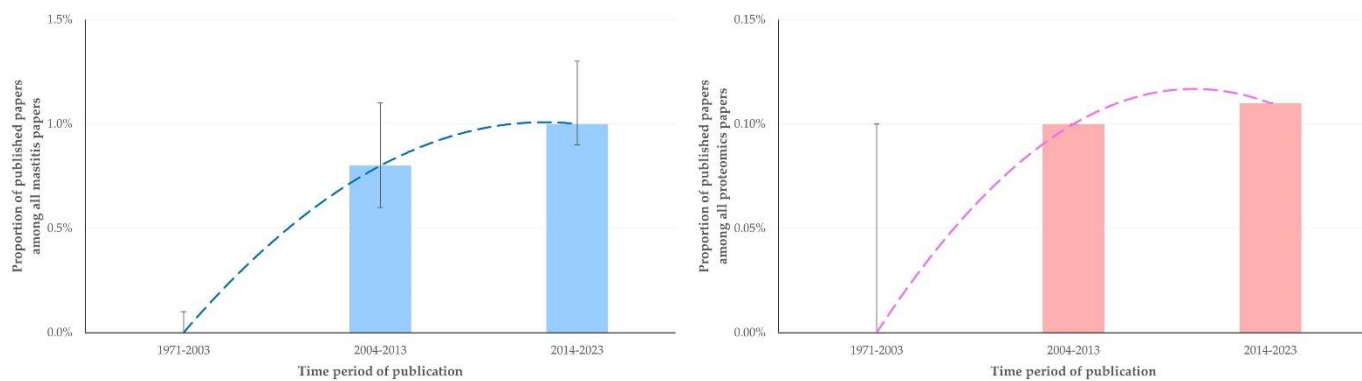

**Table S3.** Number of published papers on mastitis and proteomics, in accord with country of origin.

| Country                  | No. of papers published |
|--------------------------|-------------------------|
| China                    | 35                      |
| United States of America | 20                      |
| Italy                    | 19                      |
| Brazil                   | 10                      |
| Greece                   | 10                      |
| France                   | 9                       |
| United Kingdom           | 9                       |
| Spain                    | 7                       |
| Canada                   | 6                       |
| Germany                  | 6                       |
| Croatia                  | 5                       |
| Denmark                  | 5                       |
| India                    | 4                       |
| New Zealand              | 3                       |
| Portugal                 | 3                       |
| Colombia                 | 2                       |
| Egypt                    | 2                       |
| Finland                  | 2                       |
| Ireland                  | 2                       |
| The Netherlands          | 2                       |
| Argentina                | 1                       |
| Australia                | 1                       |
| Czech Republic           | 1                       |
| Hungary                  | 1                       |
| Japan                    | 1                       |
| Korea                    | 1                       |
| Norway                   | 1                       |
| Pakistan                 | 1                       |
| Poland                   | 1                       |
| Russia                   | 1                       |
| Saudi Arabia             | 1                       |
| Thailand                 | 1                       |
| Turkey                   | 1                       |

**Table S4.** Scientific establishments in the 12 countries with most ( $\geq 5$ ) published papers on mastitis and proteomics and respective number of papers from these.

| Scientific establishment                                                    | Country <sup>1</sup> | No. of papers published |
|-----------------------------------------------------------------------------|----------------------|-------------------------|
| University of Thessaly                                                      | GRC                  | 10                      |
| University of Milan                                                         | ITA                  | 9                       |
| US Department of Agriculture                                                | USA                  | 9                       |
| Gansu Agricultural University                                               | CHN                  | 8                       |
| Academy of Athens                                                           | GRC                  | 7                       |
| Porto Conte Research Institute                                              | ITA                  | 7                       |
| University of Glasgow                                                       | GBR                  | 7                       |
| Agrocampus Ovest                                                            | FRA                  | 6                       |
| Anhui Academy of Agricultural Sciences                                      | CHN                  | 6                       |
| Chinese Academy of Agricultural Sciences                                    | CHN                  | 6                       |
| Food and Drug Administration                                                | USA                  | 6                       |
| French National Research Institute for Agriculture, Food and Environment    | FRA                  | 6                       |
| Aarhus University                                                           | DNK                  | 5                       |
| University of Zagreb                                                        | HRV                  | 5                       |
| Beijing University of Agriculture                                           | CHN                  | 4                       |
| National Agency for Food, Environmental and Occupational Health & Safety    | FRA                  | 4                       |
| Northeast Agricultural University                                           | CHN                  | 4                       |
| University of Guelph                                                        | CAN                  | 4                       |
| University of Santiago de Compostela                                        | ESP                  | 4                       |
| Federal University of Minas Gerais                                          | BRA                  | 3                       |
| Free University of Berlin                                                   | DEU                  | 3                       |
| Sao Paulo State University                                                  | BRA                  | 3                       |
| University of Sassari                                                       | ITA                  | 3                       |
| Federal Rural University of Rio de Janeiro                                  | BRA                  | 2                       |
| Institute for Systems Biology                                               | USA                  | 2                       |
| Institute for the Animal Production System in the Mediterranean Environment | ITA                  | 2                       |
| Mediterranean Center For Disease Control                                    | ITA                  | 2                       |
| Sichuan Agricultural University                                             | CHN                  | 2                       |
| University of California, Davis                                             | USA                  | 2                       |
| University of Clermont Auvergne                                             | FRA                  | 2                       |
| University of Padua                                                         | ITA                  | 2                       |
| Yangzhou University                                                         | CHN                  | 2                       |
| Zhejiang University                                                         | CHN                  | 2                       |
| Agricultural University of Athens                                           | GRC                  | 1                       |
| Animal & Plant Health Agency                                                | GBR                  | 1                       |
| Boise State University                                                      | USA                  | 1                       |
| Chinese Academy of Sciences                                                 | CHN                  | 1                       |
| Cornell University                                                          | USA                  | 1                       |
| Federal University of Santa Maria                                           | BRA                  | 1                       |
| Federal University of Vicosa                                                | BRA                  | 1                       |
| Fluminense Federal University                                               | BRA                  | 1                       |
| Guanxi University                                                           | CHN                  | 1                       |
| Hipra Scientific Inc.                                                       | ESP                  | 1                       |

|                                               |     |   |
|-----------------------------------------------|-----|---|
| Huazhong Agricultural University              | CHN | 1 |
| JAM Council                                   | FRA | 1 |
| Jiangsu Academy of Agricultural Sciences      | CHN | 1 |
| Kingston University                           | GBR | 1 |
| Lanzhou University                            | CHN | 1 |
| Ludwig Maximilians University of Munich       | DEU | 1 |
| McGill University                             | CAN | 1 |
| Nanjing Agricultural University               | CHN | 1 |
| Polytechnic of Milan                          | ITA | 1 |
| Precigen Inc.                                 | USA | 1 |
| Rockefeller University                        | USA | 1 |
| Shandong Academy of Agricultural Sciences     | CHN | 1 |
| Shihezi University                            | CHN | 1 |
| Texas Tech University                         | USA | 1 |
| University of Alberta                         | CAN | 1 |
| University of Bonn                            | DEU | 1 |
| University of Greifswald                      | DEU | 1 |
| University of Maryland                        | USA | 1 |
| University of Murcia                          | ESP | 1 |
| University of Naples Federico II              | ITA | 1 |
| University of Nottingham                      | GBR | 1 |
| University of Perugia                         | ITA | 1 |
| University of Zaragoza                        | ESP | 1 |
| Virginia Tech                                 | USA | 1 |
| Waksman Institute of Microbiology             | USA | 1 |
| Zhejiang University of Science and Technology | CHN | 1 |

---

<sup>1</sup> abbreviations of country names according to International Naming Convention ISO 3166.

**Table S5.** Number of published papers on mastitis and proteomics, in accord with mammalian species involved in respective studies.

| Mammalian species | No. of published papers |
|-------------------|-------------------------|
| Cattle            | 101                     |
| Sheep             | 20                      |
| Goat              | 10                      |
| Buffalo           | 3                       |
| Human             | 2                       |
| Rat               | 2                       |
| Camel             | 1                       |
| Mouse             | 1                       |
| Yak               | 1                       |

**Table S6.** Number of original articles on mastitis and proteomics, in accord with country of origin and animal species involved in respective studies.

| Country <sup>1</sup>     | Animal species |        |      |     |       |     |
|--------------------------|----------------|--------|------|-----|-------|-----|
|                          | Buffalo        | Cattle | Goat | Rat | Sheep | Yak |
| Brazil                   | 2              | 6      | 1    | 0   | 0     | 0   |
| Canada                   | 0              | 5      | 0    | 0   | 0     | 0   |
| China                    | 0              | 29     | 1    | 2   | 1     | 1   |
| Croatia                  | 0              | 3      | 0    | 0   | 0     | 0   |
| Denmark                  | 0              | 4      | 0    | 0   | 0     | 0   |
| France                   | 0              | 3      | 0    | 0   | 5     | 0   |
| Germany                  | 0              | 5      | 0    | 0   | 0     | 0   |
| Greece                   | 0              | 1      | 0    | 0   | 7     | 0   |
| Italy                    | 1              | 5      | 4    | 0   | 6     | 0   |
| Spain                    | 0              | 7      | 0    | 0   | 0     | 0   |
| United Kingdom           | 1              | 5      | 1    | 0   | 0     | 0   |
| United States of America | 0              | 15     | 2    | 0   | 0     | 0   |

<sup>1</sup> only the 12 countries with most ( $\geq 5$ ) published papers are included.

**Figure S2.** Number of original articles on mastitis and proteomics in accord with country of origin <sup>1</sup> and animal species involved in respective studies.

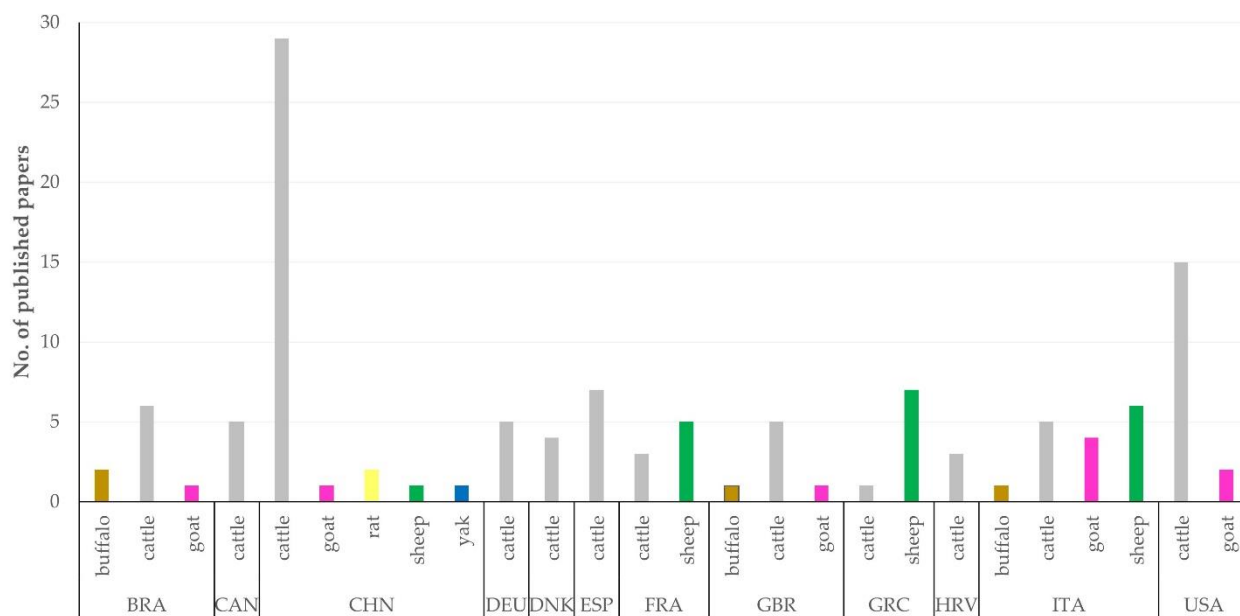

<sup>1</sup> only the 12 countries with most ( $\geq 5$ ) published papers are included.

**Figure S3.** Number of original articles on mastitis and proteomics in accord with mammalian species involved in the study and type of work (experimental: blue - field: green) performed in respective studies.

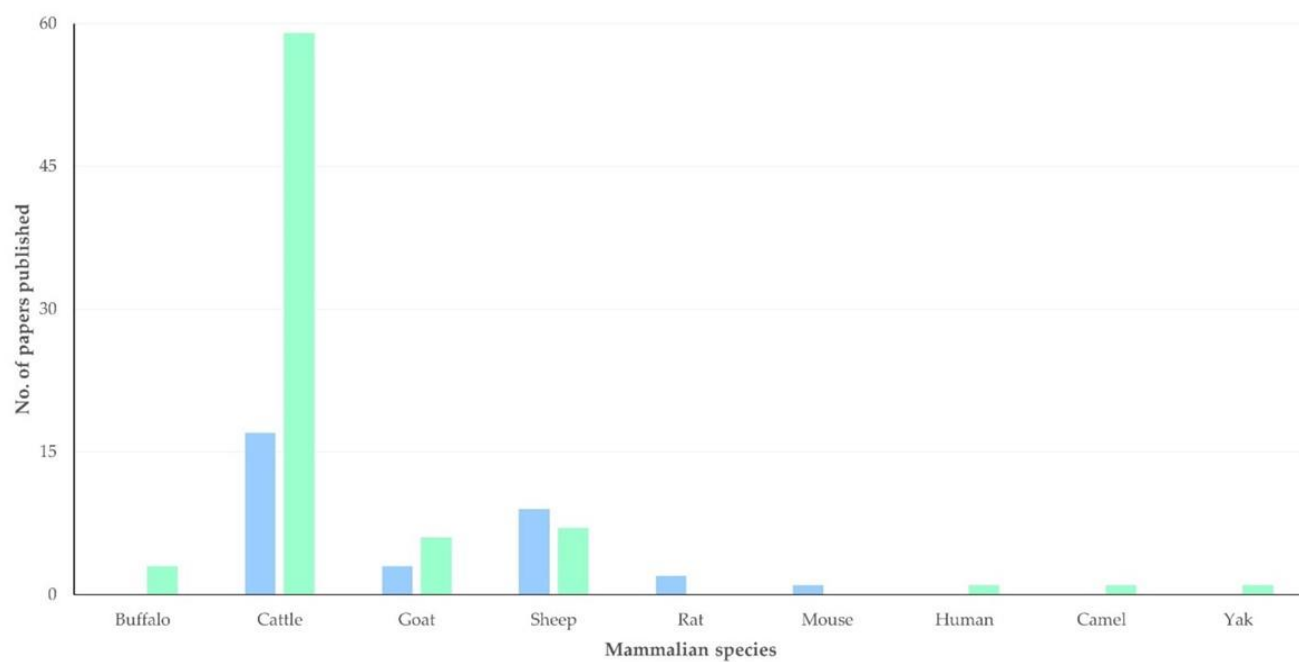

**Table S7.** Number of original articles on mastitis and proteomics by type of work referred to therein (experimental work or field work) and in accord with mammalian species involved in respective studies.

| Mammalian species | Type of work      |            |
|-------------------|-------------------|------------|
|                   | Experimental work | Field work |
| Buffalo           | 0 (0.0%)          | 3 (100.0%) |
| Cattle            | 17 (22.4%)        | 59 (77.6%) |
| Goat              | 3 (33.3%)         | 6 (66.7%)  |
| Sheep             | 9 (56.2%)         | 7 (43.8%)  |
| Rat               | 2 (100.0%)        | 0 (0.0%)   |
| Mouse             | 1 (100.0%)        | 0 (0.0%)   |
| Human             | 0 (0.0%)          | 1 (100.0%) |
| Camel             | 0 (0.0%)          | 1 (100.0%) |
| Yak               | 0 (0.0%)          | 1 (100.0%) |

**Figure S4.** Box and whisker plot for year of publication of original articles on mastitis and proteomics by type of work in respective studies: experimental work (blue), field work (green) or laboratory-based work (grey).

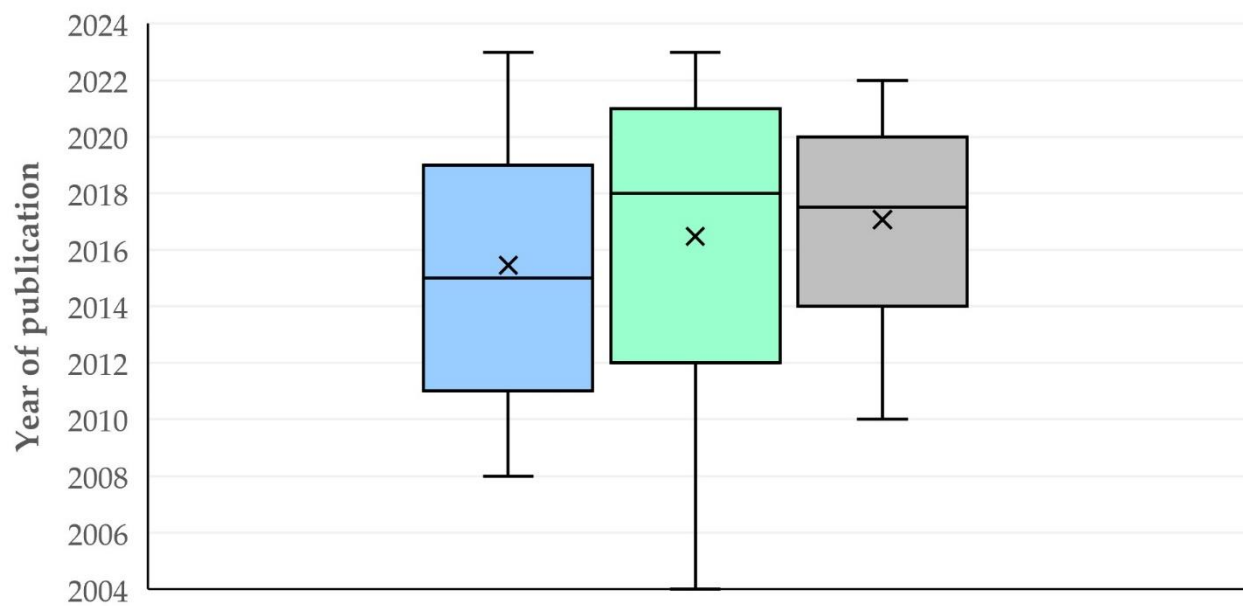

**Figure S5.** Number of original articles on mastitis and proteomics, in accord with material assessed in respective studies.

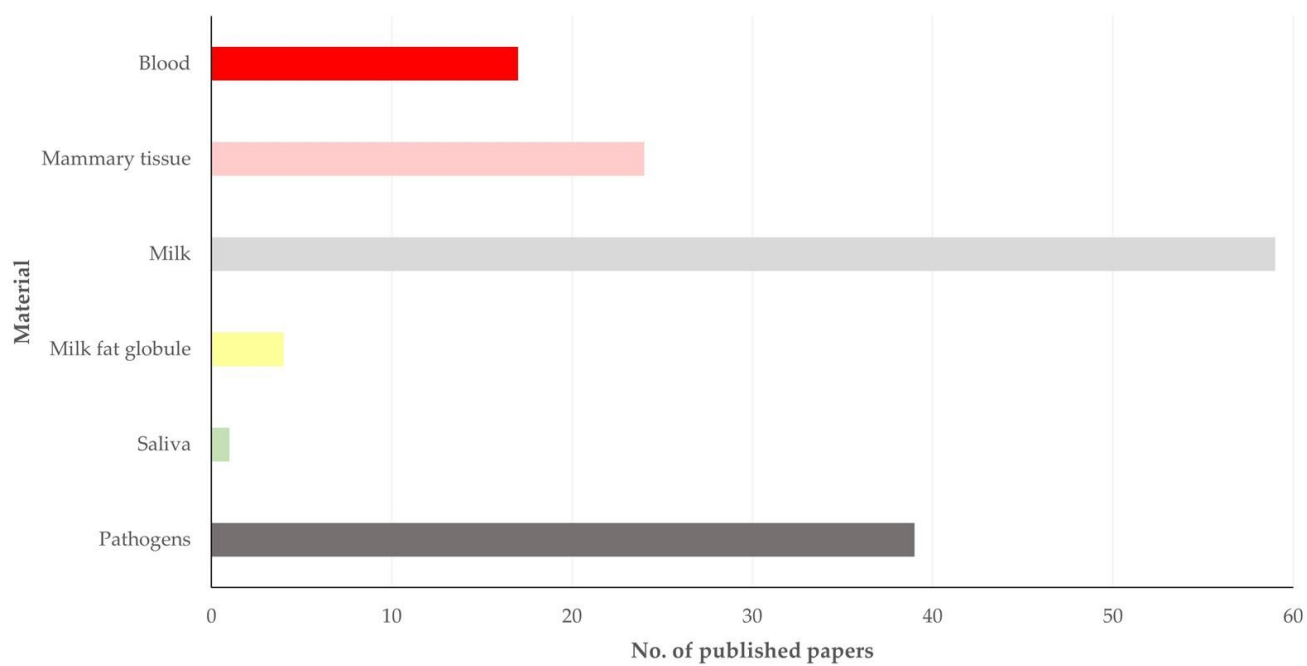

**Table S8.** Number of original articles on mastitis and proteomics, in accord with country of origin and mastitis aspect in respective studies.

| Country <sup>1</sup>     | Mastitis aspect |           |              |           |
|--------------------------|-----------------|-----------|--------------|-----------|
|                          | Aetiology       | Diagnosis | Pathogenesis | Treatment |
| Brazil                   | 1               | 4         | 2            | 3         |
| Canada                   | 0               | 3         | 3            | 0         |
| China                    | 0               | 15        | 17           | 17        |
| Croatia                  | 0               | 1         | 3            | 0         |
| Denmark                  | 0               | 4         | 3            | 0         |
| France                   | 2               | 0         | 7            | 1         |
| Germany                  | 0               | 4         | 2            | 0         |
| Greece                   | 0               | 6         | 1            | 0         |
| Italy                    | 0               | 2         | 14           | 6         |
| Spain                    | 0               | 5         | 0            | 2         |
| United Kingdom           | 0               | 4         | 4            | 1         |
| United States of America | 0               | 9         | 8            | 2         |

<sup>1</sup> only the 12 countries with most ( $\geq 5$ ) published papers are included.

**Table S9.** Number of original articles on mastitis and proteomics, in accord with material assessed and mastitis aspect in the respective studies.

| Mastitis aspect studied | Material assessed |                |      |                  |        |           |
|-------------------------|-------------------|----------------|------|------------------|--------|-----------|
|                         | Blood             | Mammary tissue | Milk | Milk fat globule | Saliva | Pathogens |
| Aetiology               | 1                 | 0              | 0    | 0                | 0      | 6         |
| Diagnosis               | 9                 | 9              | 44   | 3                | 0      | 13        |
| Pathogenesis            | 11                | 17             | 19   | 1                | 1      | 16        |
| Treatment               | 2                 | 9              | 5    | 0                | 0      | 13        |

**Table S10.** Pathogens included in studies on mastitis and proteomics and number of original articles describing their evaluation in respective studies.

| Pathogen                                     | No. of articles published |
|----------------------------------------------|---------------------------|
| <i>Staphylococcus aureus</i>                 | 55                        |
| <i>Escherichia coli</i>                      | 31                        |
| <i>Streptococcus uberis</i>                  | 19                        |
| <i>Streptococcus agalactiae</i>              | 11                        |
| <i>Staphylococcus chromogenes</i>            | 7                         |
| <i>Mannheimia haemolytica</i>                | 6                         |
| <i>Streptococcus dysgalactiae</i>            | 6                         |
| <i>Staphylococcus epidermidis</i>            | 5                         |
| <i>Staphylococcus xylosus</i>                | 4                         |
| <i>Streptococcus parauberis</i>              | 4                         |
| <i>Prototheca zopfii</i>                     | 3                         |
| <i>Staphylococcus canis</i>                  | 3                         |
| <i>Staphylococcus warneri</i>                | 3                         |
| <i>Streptococcus gallolyticus</i>            | 3                         |
| <i>Corynebacterium bovis</i>                 | 2                         |
| <i>Mycoplasma agalactiae</i>                 | 2                         |
| <i>Serratia marcescens</i>                   | 2                         |
| <i>Staphylococcus auricularis</i>            | 2                         |
| <i>Staphylococcus cohnii</i>                 | 2                         |
| <i>Arthrobacter gandavensis</i>              | 1                         |
| <i>Bacillus muralis</i>                      | 1                         |
| <i>Bacillus simplex</i>                      | 1                         |
| <i>Candida albicans</i>                      | 1                         |
| <i>Citrobacter freundii</i>                  | 1                         |
| coagulase-negative <i>Staphylococcus</i> sp. | 1                         |
| <i>Corynebacterium</i>                       | 1                         |
| <i>Enterobacter asburiae</i>                 | 1                         |
| <i>Enterobacter cloacae</i>                  | 1                         |
| <i>Enterococcus faecalis</i>                 | 1                         |
| <i>Klebsiella oxytoca</i>                    | 1                         |
| <i>Klebsiella pneumoniae</i>                 | 1                         |
| <i>Kodamea ohmeri</i>                        | 1                         |
| <i>Lactobacillus lactis</i>                  | 1                         |
| <i>Mycoplasma bovis</i>                      | 1                         |
| <i>Mycoplasma mycoides</i>                   | 1                         |
| <i>Paenibacillus odorifer</i>                | 1                         |
| <i>Plasmodium beghei</i>                     | 1                         |
| <i>Prototheca blaschkeae</i>                 | 1                         |
| <i>Staphylococcus capitis</i>                | 1                         |
| <i>Staphylococcus caprae</i>                 | 1                         |
| <i>Staphylococcus haemolyticus</i>           | 1                         |
| <i>Staphylococcus hominis</i>                | 1                         |
| <i>Staphylococcus hyicus</i>                 | 1                         |
| <i>Staphylococcus lugdunensis</i>            | 1                         |
| <i>Staphylococcus simulans</i>               | 1                         |
| <i>Streptococcus equinus</i>                 | 1                         |



**Table S11.** Number of original articles on mastitis associated with *Escherichia coli* or *Staphylococcus aureus* or *Streptococcus uberis* and proteomics, in accord with study details.

|                       | Bacteria                     |                         |                             |
|-----------------------|------------------------------|-------------------------|-----------------------------|
|                       | <i>Staphylococcus aureus</i> | <i>Escherichia coli</i> | <i>Streptococcus uberis</i> |
| Mammalian species     |                              |                         |                             |
| Buffalo               | 1                            | 0                       | 1                           |
| Cattle                | 41                           | 25                      | 16                          |
| Camel                 | 1                            | 0                       | 0                           |
| Goat                  | 4                            | 3                       | 0                           |
| Human                 | 0                            | 0                       | 0                           |
| Mouse                 | 0                            | 0                       | 0                           |
| Rat                   | 0                            | 0                       | 0                           |
| Sheep                 | 8                            | 2                       | 2                           |
| Yak                   | 1                            | 1                       | 0                           |
| Mastitis aspect       |                              |                         |                             |
| Aetiology             | 7                            | 0                       | 1                           |
| Diagnosis             | 20                           | 17                      | 8                           |
| Pathogenesis          | 30                           | 12                      | 9                           |
| Treatment             | 14                           | 9                       | 3                           |
| Type of study         |                              |                         |                             |
| Field work            | 34                           | 15                      | 10                          |
| Experimental work     | 11                           | 10                      | 6                           |
| Laboratory-based work | 10                           | 6                       | 3                           |
| Material assessed     |                              |                         |                             |
| Blood                 | 5                            | 3                       | 2                           |
| Mammary tissue        | 13                           | 7                       | 2                           |
| Milk                  | 20                           | 18                      | 9                           |
| Milk fat globule      | 1                            | 0                       | 1                           |
| Saliva                | 0                            | 0                       | 1                           |
| Pathogens             | 17                           | 5                       | 6                           |

**Table S12.** Number of original articles with the various proteomics methodological approaches, in accord with material assessed in respective studies.

| Proteomics methodological approaches <sup>1</sup> | Material assessed |                |      |                  |        |           |
|---------------------------------------------------|-------------------|----------------|------|------------------|--------|-----------|
|                                                   | Blood             | Mammary tissue | Milk | Milk fat globule | Saliva | Pathogens |
| LC-MS/MS                                          | 5                 | 16             | 24   | 2                | 1      | 12        |
| 2-DE, MALDI-TOF MS                                | 5                 | 2              | 12   | 0                | 0      | 8         |
| 2-DE, LC-MS/MS                                    | 5                 | 1              | 9    | 0                | 0      | 4         |
| 2D-DIGE, MALDI-TOF MS, GeLC-MS/MS                 | 1                 | 0              | 7    | 2                | 0      | 4         |
| MALDI-TOF MS                                      | 0                 | 0              | 2    | 0                | 0      | 8         |
| GeLC-MS/MS                                        | 1                 | 0              | 2    | 0                | 0      | 2         |
| Bioinformatics                                    | 0                 | 2              | 2    | 0                | 0      | 1         |
| LC-MS/MS, Bioinformatics                          | 0                 | 3              | 0    | 0                | 0      | 0         |
| MALDI-TOF MS, LC-MS/MS                            | 0                 | 0              | 1    | 0                | 0      | 0         |

<sup>1</sup> LC-MS/MS: liquid chromatography-tandem mass spectrometry, 2-DE: two dimensional gel electrophoresis, MALDI-TOF MS: matrix-assisted laser desorption/ionization coupled to time-of-flight mass spectrometry, 2D-DIGE: two-dimensional difference gel electrophoresis, GeLC-MS/MS: polyacrylamide gel electrophoresis followed by liquid chromatography-tandem mass spectrometry.

**Table S13.** Results of pairwise correlation analysis ( $r_{sp}$ ) for proteomics methodological approach, mammalian species, mastitis aspect, material assessed and year of publication described in original articles on mastitis and proteomics.

|                     | Proteomics approach      | Mammalian species      | Mastitis aspect         | Material assessed      | Year of publication |
|---------------------|--------------------------|------------------------|-------------------------|------------------------|---------------------|
| Proteomics approach |                          |                        |                         |                        |                     |
| Mammalian species   | 0.19<br>( $p = 0.009$ )  |                        |                         |                        |                     |
| Mastitis aspect     | 0.15<br>( $p = 0.045$ )  | 0.09<br>( $p = 0.22$ ) |                         |                        |                     |
| Material assessed   | 0.03<br>( $p = 0.66$ )   | 0.12<br>( $p = 0.10$ ) | 0.05<br>( $p = 0.53$ )  |                        |                     |
| Year of publication | 0.40<br>( $p < 0.0001$ ) | 0.02<br>( $p = 0.80$ ) | 0.15<br>( $p = 0.046$ ) | 0.08<br>( $p = 0.27$ ) |                     |

**Table S14.** Eigenvalues for principal component analysis for proteomics approach, mammalian species, mastitis aspect, material assessed and year of publication described in original articles on mastitis and proteomics.

| Parameter               | PC1   | PC2   | PC3   | PC4   | PC5    |
|-------------------------|-------|-------|-------|-------|--------|
| Eigenvalue              | 1.60  | 1.18  | 0.92  | 0.80  | 0.51   |
| % of Variance           | 32.01 | 23.50 | 18.37 | 16.01 | 10.11  |
| Cumulative variance (%) | 32.01 | 55.51 | 73.87 | 89.89 | 100.00 |

**Figure S6.** Scree-plot of results of principal components analysis for proteomics methodological approach, mammalian species, mastitis aspect, material assessed and year of publication in original articles on mastitis and proteomics.

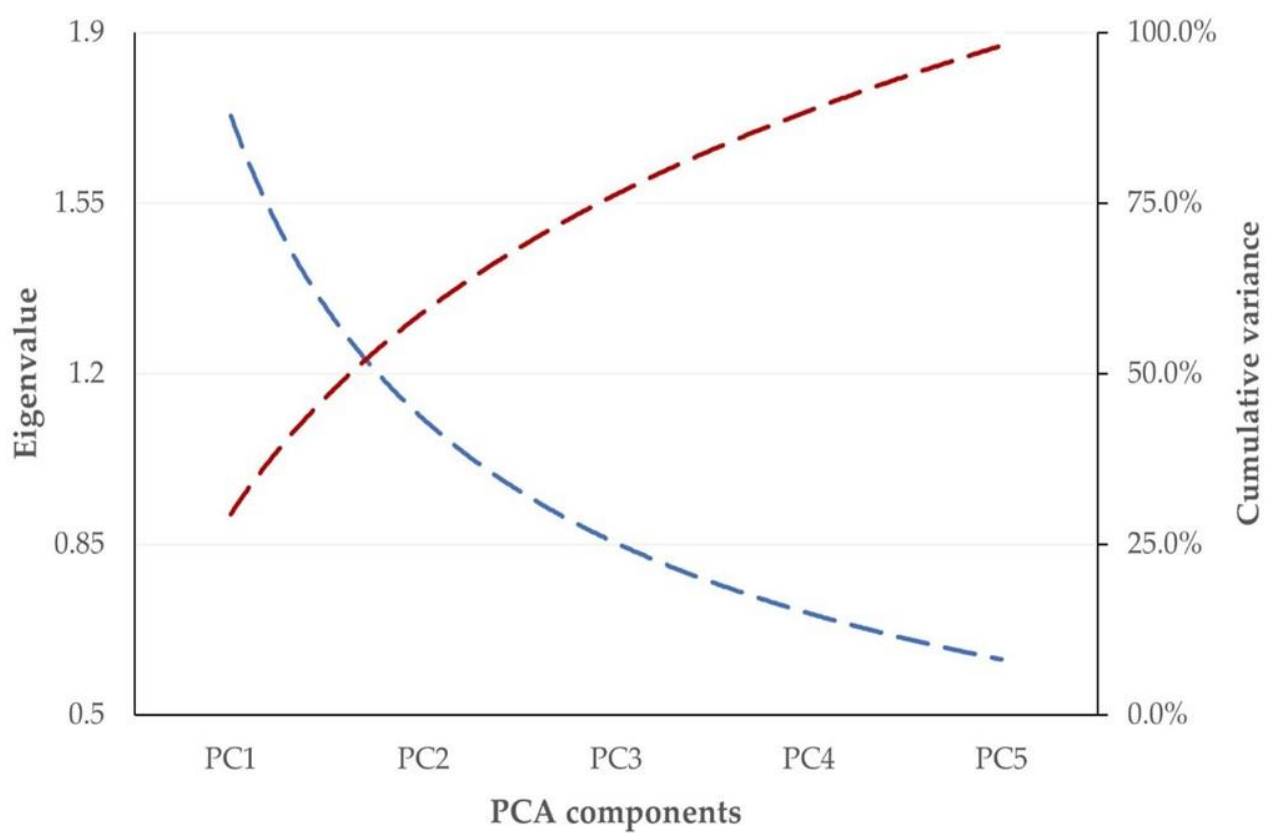

**Figure S7.** Ternary plot of results of principal components analysis for proteomics approach, mammalian species, mastitis aspect, material assessed and year of publication described in papers on mastitis and proteomics.

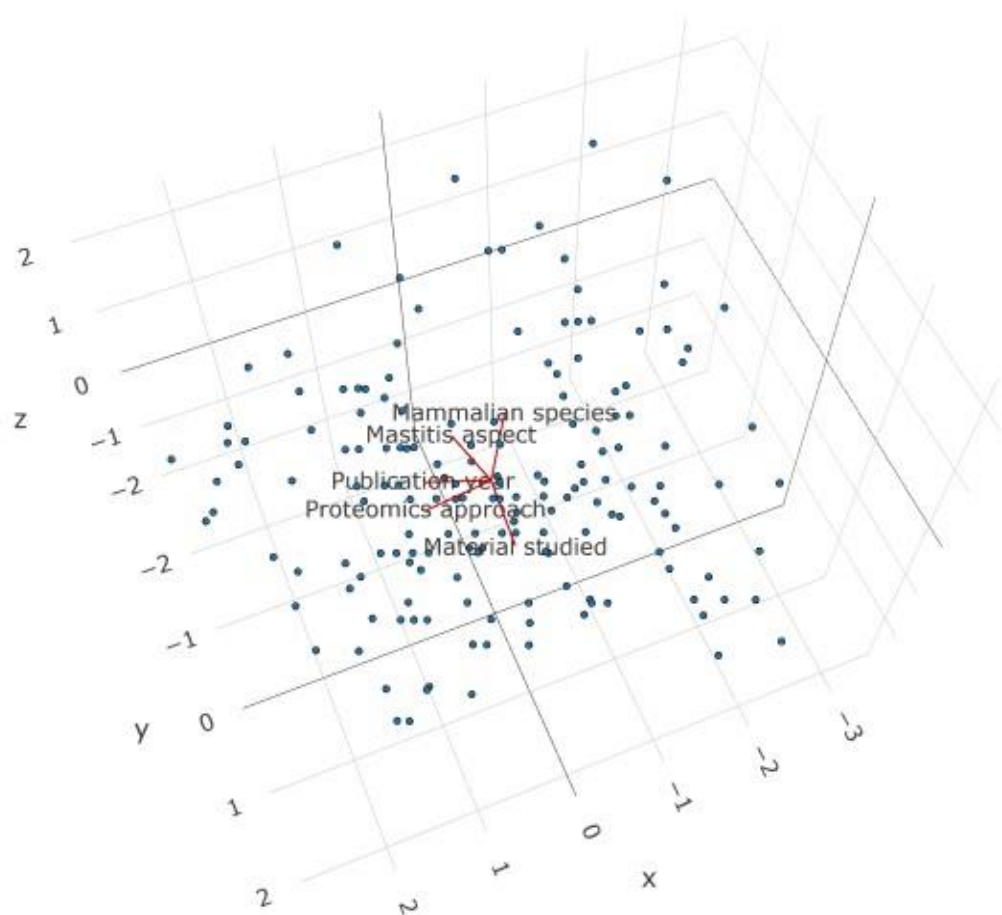

**Table S15.** Heat plot of combinations of proteomics methodological approach, mammalian species, mastitis aspect and year of publication described in original articles on mastitis and proteomics.

| Proteomics method-logical approach <sup>1</sup> | Year of publication | Mastitis aspect | Mammalian species | No. of articles published |
|-------------------------------------------------|---------------------|-----------------|-------------------|---------------------------|
| 2-DE, MALDI-TOF MS                              | 2019                | Diagnosis       | Sheep             | 6                         |
| LC-MS/MS                                        | 2020                | Diagnosis       | Cattle            | 4                         |
| LC-MS/MS                                        | 2018                | Pathogenesis    | Cattle            | 4                         |
| LC-MS/MS                                        | 2020                | Pathogenesis    | Cattle            | 4                         |
| LC-MS/MS                                        | 2021                | Pathogenesis    | Cattle            | 4                         |
| LC-MS/MS                                        | 2022                | Treatment       | Cattle            | 4                         |
| 2-DE, MALDI-TOF MS                              | 2012                | Diagnosis       | Cattle            | 3                         |
| 2D-DIGE, MALDI-TOF MS, GeLC-MS/MS               | 2010                | Diagnosis       | Cattle            | 3                         |
| LC-MS/MS                                        | 2018                | Diagnosis       | Cattle            | 3                         |
| 2-DE, LC-MS/MS                                  | 2016                | Diagnosis       | Cattle            | 3                         |
| LC-MS/MS                                        | 2022                | Pathogenesis    | Cattle            | 3                         |
| LC-MS/MS                                        | 2023                | Pathogenesis    | Cattle            | 3                         |
| Bioinformatics                                  | 2022                | Treatment       | Cattle            | 3                         |
| MALDI-TOF MS                                    | 2022                | Aetiology       | Cattle            | 2                         |
| 2-DE, MALDI-TOF MS                              | 2013                | Diagnosis       | Cattle            | 2                         |
| 2D-DIGE, MALDI-TOF MS, GeLC-MS/MS               | 2014                | Diagnosis       | Cattle            | 2                         |
| LC-MS/MS                                        | 2010                | Diagnosis       | Cattle            | 2                         |
| LC-MS/MS                                        | 2016                | Diagnosis       | Cattle            | 2                         |
| LC-MS/MS                                        | 2023                | Diagnosis       | Cattle            | 2                         |
| 2-DE, LC-MS/MS                                  | 2009                | Diagnosis       | Cattle            | 2                         |
| MALDI-TOF MS                                    | 2017                | Diagnosis       | Cattle            | 2                         |
| 2-DE, MALDI-TOF MS                              | 2013                | Pathogenesis    | Cattle            | 2                         |
| 2D-DIGE, MALDI-TOF MS, GeLC-MS/MS               | 2010                | Pathogenesis    | Cattle            | 2                         |
| LC-MS/MS                                        | 2010                | Pathogenesis    | Cattle            | 2                         |
| LC-MS/MS                                        | 2013                | Pathogenesis    | Cattle            | 2                         |
| LC-MS/MS                                        | 2014                | Pathogenesis    | Cattle            | 2                         |
| 2-DE, MALDI-TOF MS                              | 2016                | Treatment       | Cattle            | 2                         |
| LC-MS/MS                                        | 2018                | Treatment       | Cattle            | 2                         |
| LC-MS/MS                                        | 2019                | Treatment       | Cattle            | 2                         |
| LC-MS/MS                                        | 2020                | Diagnosis       | Goat              | 2                         |
| 2D-DIGE, MALDI-TOF MS, GeLC-MS/MS               | 2011                | Diagnosis       | Sheep             | 2                         |
| 2D-DIGE, MALDI-TOF MS, GeLC-MS/MS               | 2013                | Diagnosis       | Sheep             | 2                         |
| 2-DE, LC-MS/MS                                  | 2011                | Pathogenesis    | Sheep             | 2                         |
| 2-DE, LC-MS/MS                                  | 2018                | Diagnosis       | Buffalo           | 1                         |
| 2-DE, LC-MS/MS                                  | 2019                | Diagnosis       | Buffalo           | 1                         |
| 2-DE, LC-MS/MS                                  | 2020                | Diagnosis       | Buffalo           | 1                         |
| 2-DE, LC-MS/MS                                  | 2019                | Pathogenesis    | Buffalo           | 1                         |
| MALDI-TOF MS                                    | 2021                | Treatment       | Camel             | 1                         |
| 2-DE, MALDI-TOF MS                              | 2009                | Aetiology       | Cattle            | 1                         |

|                                   |      |              |        |   |
|-----------------------------------|------|--------------|--------|---|
| 2D-DIGE, MALDI-TOF MS, GeLC-MS/MS | 2011 | Aetiology    | Cattle | 1 |
| 2-DE, LC-MS/MS                    | 2022 | Aetiology    | Cattle | 1 |
| 2-DE, MALDI-TOF MS                | 2004 | Diagnosis    | Cattle | 1 |
| 2-DE, MALDI-TOF MS                | 2008 | Diagnosis    | Cattle | 1 |
| 2-DE, MALDI-TOF MS                | 2009 | Diagnosis    | Cattle | 1 |
| 2-DE, MALDI-TOF MS                | 2011 | Diagnosis    | Cattle | 1 |
| 2-DE, MALDI-TOF MS                | 2014 | Diagnosis    | Cattle | 1 |
| 2-DE, MALDI-TOF MS                | 2015 | Diagnosis    | Cattle | 1 |
| 2-DE, MALDI-TOF MS                | 2018 | Diagnosis    | Cattle | 1 |
| 2-DE, MALDI-TOF MS                | 2020 | Diagnosis    | Cattle | 1 |
| 2D-DIGE, MALDI-TOF MS, GeLC-MS/MS | 2012 | Diagnosis    | Cattle | 1 |
| GeLC-MS/MS                        | 2010 | Diagnosis    | Cattle | 1 |
| LC-MS/MS                          | 2012 | Diagnosis    | Cattle | 1 |
| LC-MS/MS                          | 2013 | Diagnosis    | Cattle | 1 |
| LC-MS/MS                          | 2014 | Diagnosis    | Cattle | 1 |
| LC-MS/MS                          | 2015 | Diagnosis    | Cattle | 1 |
| LC-MS/MS                          | 2017 | Diagnosis    | Cattle | 1 |
| LC-MS/MS                          | 2019 | Diagnosis    | Cattle | 1 |
| LC-MS/MS                          | 2021 | Diagnosis    | Cattle | 1 |
| LC-MS/MS                          | 2022 | Diagnosis    | Cattle | 1 |
| 2-DE, LC-MS/MS                    | 2012 | Diagnosis    | Cattle | 1 |
| 2-DE, LC-MS/MS                    | 2015 | Diagnosis    | Cattle | 1 |
| Bioinformatics                    | 2023 | Diagnosis    | Cattle | 1 |
| MALDI-TOF MS                      | 2012 | Diagnosis    | Cattle | 1 |
| MALDI-TOF MS                      | 2020 | Diagnosis    | Cattle | 1 |
| LC-MS/MS, Bioinformatics          | 2023 | Diagnosis    | Cattle | 1 |
| 2-DE, MALDI-TOF MS                | 2004 | Pathogenesis | Cattle | 1 |
| 2-DE, MALDI-TOF MS                | 2007 | Pathogenesis | Cattle | 1 |
| 2-DE, MALDI-TOF MS                | 2015 | Pathogenesis | Cattle | 1 |
| 2-DE, MALDI-TOF MS                | 2020 | Pathogenesis | Cattle | 1 |
| 2D-DIGE, MALDI-TOF MS, GeLC-MS/MS | 2007 | Pathogenesis | Cattle | 1 |
| 2D-DIGE, MALDI-TOF MS, GeLC-MS/MS | 2012 | Pathogenesis | Cattle | 1 |
| GeLC-MS/MS                        | 2005 | Pathogenesis | Cattle | 1 |
| GeLC-MS/MS                        | 2010 | Pathogenesis | Cattle | 1 |
| GeLC-MS/MS                        | 2014 | Pathogenesis | Cattle | 1 |
| LC-MS/MS                          | 2006 | Pathogenesis | Cattle | 1 |
| LC-MS/MS                          | 2009 | Pathogenesis | Cattle | 1 |
| LC-MS/MS                          | 2012 | Pathogenesis | Cattle | 1 |
| LC-MS/MS                          | 2016 | Pathogenesis | Cattle | 1 |
| LC-MS/MS                          | 2019 | Pathogenesis | Cattle | 1 |
| 2-DE, LC-MS/MS                    | 2009 | Pathogenesis | Cattle | 1 |
| 2-DE, LC-MS/MS                    | 2011 | Pathogenesis | Cattle | 1 |
| 2-DE, LC-MS/MS                    | 2012 | Pathogenesis | Cattle | 1 |
| 2-DE, LC-MS/MS                    | 2014 | Pathogenesis | Cattle | 1 |

|                                      |      |              |        |   |
|--------------------------------------|------|--------------|--------|---|
| 2-DE, LC-MS/MS                       | 2020 | Pathogenesis | Cattle | 1 |
| 2-DE, LC-MS/MS                       | 2022 | Pathogenesis | Cattle | 1 |
| Bioinformatics                       | 2022 | Pathogenesis | Cattle | 1 |
| MALDI-TOF MS                         | 2018 | Pathogenesis | Cattle | 1 |
| MALDI-TOF MS                         | 2021 | Pathogenesis | Cattle | 1 |
| LC-MS/MS,<br>Bioinformatics          | 2023 | Pathogenesis | Cattle | 1 |
| 2-DE, MALDI-TOF MS                   | 2015 | Treatment    | Cattle | 1 |
| 2-DE, MALDI-TOF MS                   | 2020 | Treatment    | Cattle | 1 |
| 2D-DIGE, MALDI-TOF<br>MS, GeLC-MS/MS | 2008 | Treatment    | Cattle | 1 |
| 2D-DIGE, MALDI-TOF<br>MS, GeLC-MS/MS | 2011 | Treatment    | Cattle | 1 |
| LC-MS/MS                             | 2010 | Treatment    | Cattle | 1 |
| LC-MS/MS                             | 2014 | Treatment    | Cattle | 1 |
| LC-MS/MS                             | 2017 | Treatment    | Cattle | 1 |
| LC-MS/MS                             | 2020 | Treatment    | Cattle | 1 |
| Bioinformatics                       | 2017 | Treatment    | Cattle | 1 |
| MALDI-TOF MS                         | 2018 | Treatment    | Cattle | 1 |
| MALDI-TOF MS                         | 2021 | Treatment    | Cattle | 1 |
| LC-MS/MS,<br>Bioinformatics          | 2021 | Treatment    | Cattle | 1 |
| MALDI-TOF MS                         | 2021 | Aetiology    | Goat   | 1 |
| 2D-DIGE, MALDI-TOF<br>MS, GeLC-MS/MS | 2010 | Diagnosis    | Goat   | 1 |
| GeLC-MS/MS                           | 2013 | Diagnosis    | Goat   | 1 |
| 2-DE, LC-MS/MS                       | 2013 | Diagnosis    | Goat   | 1 |
| 2-DE, LC-MS/MS                       | 2015 | Diagnosis    | Goat   | 1 |
| MALDI-TOF MS, LC-<br>MS/MS           | 2020 | Diagnosis    | Goat   | 1 |
| 2D-DIGE, MALDI-TOF<br>MS, GeLC-MS/MS | 2010 | Pathogenesis | Goat   | 1 |
| LC-MS/MS                             | 2020 | Pathogenesis | Goat   | 1 |
| 2-DE, LC-MS/MS                       | 2013 | Pathogenesis | Goat   | 1 |
| LC-MS/MS                             | 2019 | Treatment    | Goat   | 1 |
| MALDI-TOF MS                         | 2021 | Treatment    | Goat   | 1 |
| LC-MS/MS                             | 2021 | Pathogenesis | Human  | 1 |
| LC-MS/MS,<br>Bioinformatics          | 2022 | Pathogenesis | Human  | 1 |
| LC-MS/MS                             | 2021 | Pathogenesis | Mouse  | 1 |
| MALDI-TOF MS                         | 2021 | Treatment    | Mouse  | 1 |
| LC-MS/MS                             | 2020 | Pathogenesis | Rat    | 1 |
| LC-MS/MS                             | 2022 | Treatment    | Rat    | 1 |
| 2-DE, MALDI-TOF MS                   | 2009 | Aetiology    | Sheep  | 1 |
| 2-DE, MALDI-TOF MS                   | 2013 | Diagnosis    | Sheep  | 1 |
| 2-DE, MALDI-TOF MS                   | 2020 | Diagnosis    | Sheep  | 1 |
| 2-DE, MALDI-TOF MS                   | 2021 | Diagnosis    | Sheep  | 1 |
| LC-MS/MS                             | 2015 | Diagnosis    | Sheep  | 1 |
| Bioinformatics                       | 2023 | Diagnosis    | Sheep  | 1 |

|                    |      |              |       |   |
|--------------------|------|--------------|-------|---|
| 2-DE, MALDI-TOF MS | 2009 | Pathogenesis | Sheep | 1 |
| 2-DE, MALDI-TOF MS | 2019 | Pathogenesis | Sheep | 1 |
| GeLC-MS/MS         | 2013 | Pathogenesis | Sheep | 1 |
| LC-MS/MS           | 2022 | Pathogenesis | Sheep | 1 |
| 2-DE, LC-MS/MS     | 2012 | Pathogenesis | Sheep | 1 |
| 2-DE, LC-MS/MS     | 2011 | Treatment    | Sheep | 1 |
| 2-DE, MALDI-TOF MS | 2014 | Diagnosis    | Yak   | 1 |
| 2-DE, MALDI-TOF MS | 2014 | Treatment    | Yak   | 1 |

<sup>1</sup> LC-MS/MS: liquid chromatography-tandem mass spectrometry, 2-DE: two dimensional gel electrophoresis, MALDI-TOF MS: matrix-assisted laser desorption/ionization coupled to time-of-flight mass spectrometry, 2D-DIGE: two-dimensional difference gel electrophoresis, GeLC-MS/MS: polyacrylamide gel electrophoresis followed by liquid chromatography-tandem mass spectrometry.

**Table S16.** Original articles on mastitis and proteomics, describing involvement of additional -omics technologies, in accord with material assessed in respective studies.

| Material assessed in studies | Involvement of additional -omics technologies | No involvement of additional -omics technologies in paper |
|------------------------------|-----------------------------------------------|-----------------------------------------------------------|
| Blood                        | 1                                             | 16                                                        |
| Mammary tissue               | 5                                             | 19                                                        |
| Milk                         | 6                                             | 53                                                        |
| Milk fat globule             | 0                                             | 4                                                         |
| Saliva                       | 0                                             | 1                                                         |
| Pathogens                    | 13                                            | 26                                                        |

**Table S17.** Journals in which papers on mastitis and proteomics were published and respective number of papers.

| Journals                                                      | No. of published papers |
|---------------------------------------------------------------|-------------------------|
| <i>Journal of Proteomics</i>                                  | 16                      |
| <i>Journal of Dairy Science</i>                               | 12                      |
| <i>Journal of Proteome Research</i>                           | 8                       |
| <i>International Journal of Molecular Sciences</i>            | 6                       |
| <i>Veterinary Microbiology</i>                                | 6                       |
| <i>Animals</i>                                                | 5                       |
| <i>Data in Brief</i>                                          | 5                       |
| <i>Veterinary Research</i>                                    | 5                       |
| <i>Proteomics</i>                                             | 4                       |
| <i>Animal</i>                                                 | 3                       |
| <i>Frontiers in Microbiology</i>                              | 3                       |
| <i>Journal of Agricultural and Food Chemistry</i>             | 3                       |
| <i>PloS One</i>                                               | 3                       |
| <i>Research in Veterinary Science</i>                         | 3                       |
| <i>Scientific Reports</i>                                     | 3                       |
| <i>Veterinary Immunology and Immunopathology</i>              | 3                       |
| <i>BMC Veterinary Research</i>                                | 2                       |
| <i>Frontiers in Veterinary Science</i>                        | 2                       |
| <i>Infection and Immunity</i>                                 | 2                       |
| <i>Journal of Dairy Research</i>                              | 2                       |
| <i>Journal of Mammary Gland Biology and Neoplasia</i>         | 2                       |
| <i>Pathogens</i>                                              | 2                       |
| <i>Agricultural Sciences in China</i>                         | 1                       |
| <i>Analytical and Bioanalytical Chemistry</i>                 | 1                       |
| <i>Animal Biotechnology</i>                                   | 1                       |
| <i>Animal Production Science</i>                              | 1                       |
| <i>Animal Science Journal</i>                                 | 1                       |
| <i>Antibiotics</i>                                            | 1                       |
| <i>Antioxidants</i>                                           | 1                       |
| <i>Applied and Environmental Microbiology</i>                 | 1                       |
| <i>Archiv fur Tierzucht</i>                                   | 1                       |
| <i>Archives of Microbiology</i>                               | 1                       |
| <i>Arquivo Brasileiro de Medicina Veterinaria e Zootecnia</i> | 1                       |
| <i>Biological Trace Element Research</i>                      | 1                       |
| <i>Biology</i>                                                | 1                       |
| <i>BMC Genomics</i>                                           | 1                       |
| <i>BMC Microbiology</i>                                       | 1                       |
| <i>Brazilian Journal of Microbiology</i>                      | 1                       |
| <i>Bulletin of the Veterinary Institute in Pulawy</i>         | 1                       |
| <i>Carbohydrate Polymers</i>                                  | 1                       |
| <i>Cell Stress &amp; Chaperones</i>                           | 1                       |
| <i>Clinical Proteomics</i>                                    | 1                       |
| <i>Colloids and Surfaces B-Biointerfaces</i>                  | 1                       |
| <i>Current Microbiology</i>                                   | 1                       |
| <i>Current Proteomics</i>                                     | 1                       |
| <i>Czech Journal of Animal Science</i>                        | 1                       |
| <i>Food Research International</i>                            | 1                       |

|                                                       |   |
|-------------------------------------------------------|---|
| <i>Foods</i>                                          | 1 |
| <i>Frontiers in Animal Science</i>                    | 1 |
| <i>Frontiers in Immunology</i>                        | 1 |
| <i>Frontiers in Pharmacology</i>                      | 1 |
| <i>Genetics and Molecular Research</i>                | 1 |
| <i>International Dairy Journal</i>                    | 1 |
| <i>International Immunopharmacology</i>               | 1 |
| <i>International Journal of Dairy Technology</i>      | 1 |
| <i>Journal of Microbiological Methods</i>             | 1 |
| <i>Journal of Molecular Biology</i>                   | 1 |
| <i>Journal of Pharmacy and Pharmacology</i>           | 1 |
| <i>Journal of Veterinary Diagnostic Investigation</i> | 1 |
| <i>Journal of Veterinary Science</i>                  | 1 |
| <i>Malaysian Journal of Microbiology</i>              | 1 |
| <i>Medical Mycology</i>                               | 1 |
| <i>Medical Oncology</i>                               | 1 |
| <i>Microbial Ecology</i>                              | 1 |
| <i>Microbial Pathogenesis</i>                         | 1 |
| <i>Microorganisms</i>                                 | 1 |
| <i>Molecular Biosystems</i>                           | 1 |
| <i>PeerJ</i>                                          | 1 |
| <i>Pesquisa Veterinaria Brasileira</i>                | 1 |
| <i>Proteome Science</i>                               | 1 |
| <i>Tropical Animal Health and Production</i>          | 1 |
| <i>Tropical Biomedicine</i>                           | 1 |
| <i>Vaccine</i>                                        | 1 |
| <i>Veterinary Journal</i>                             | 1 |
| <i>Veterinary Research Communications</i>             | 1 |
| <i>Veterinary World</i>                               | 1 |
| <i>Virulence</i>                                      | 1 |
| <i>Virus Genes</i>                                    | 1 |

---

**Table S18.** Association between journals and countries of origin of published papers on mastitis and proteomics.

| Country <sup>1</sup>     | Journal <sup>2</sup> |                   |                         |                      |                         |                    |                        |                  |
|--------------------------|----------------------|-------------------|-------------------------|----------------------|-------------------------|--------------------|------------------------|------------------|
|                          | <i>Animals</i>       | <i>Data Brief</i> | <i>Int. J. Mol Sci.</i> | <i>J. Dairy Sci.</i> | <i>J. Proteome Res.</i> | <i>J. Proteom.</i> | <i>Vet. Microbiol.</i> | <i>Vet. Res.</i> |
| Brazil                   | 0                    | 0                 | 0                       | 3                    | 0                       | 0                  | 0                      | 0                |
| Canada                   | 0                    | 1                 | 1                       | 1                    | 1                       | 0                  | 0                      | 0                |
| China                    | 3                    | 0                 | 2                       | 0                    | 0                       | 0                  | 0                      | 1                |
| Croatia                  | 1                    | 0                 | 0                       | 0                    | 0                       | 2                  | 0                      | 0                |
| Denmark                  | 0                    | 0                 | 0                       | 2                    | 1                       | 1                  | 0                      | 0                |
| France                   | 0                    | 0                 | 1                       | 0                    | 0                       | 1                  | 2                      | 2                |
| Germany                  | 0                    | 0                 | 1                       | 0                    | 0                       | 1                  | 0                      | 0                |
| Greece                   | 1                    | 2                 | 1                       | 0                    | 0                       | 1                  | 1                      | 0                |
| Italy                    | 0                    | 1                 | 0                       | 0                    | 0                       | 6                  | 2                      | 1                |
| Spain                    | 0                    | 0                 | 0                       | 0                    | 0                       | 1                  | 0                      | 0                |
| United Kingdom           | 0                    | 0                 | 0                       | 0                    | 1                       | 2                  | 0                      | 0                |
| United States of America | 0                    | 1                 | 1                       | 5                    | 2                       | 3                  | 0                      | 0                |

<sup>1</sup> only the 12 countries with most ( $\geq 5$ ) published papers are included.

<sup>2</sup>: abbreviations of journals from left to right: *Animals*, *Data in Brief*, *International Journal of Molecular Sciences*, *Journal of Dairy Science*, *Journal of Proteome Research*, *Journal of Proteomics*, *Veterinary Microbiology*, *Veterinary Research*.

**Table S19.** Sub-categories of journals in Web-of Science, in which papers on mastitis and proteomics were published, and respective number of papers.

| Sub-categories of journals           | No. of published papers |
|--------------------------------------|-------------------------|
| Veterinary Sciences                  | 39                      |
| Biochemical Research Methods         | 33                      |
| Agriculture, Dairy & Animal Science  | 26                      |
| Microbiology                         | 22                      |
| Food Science & Technology            | 20                      |
| Multidisciplinary Sciences           | 12                      |
| Biochemistry & Molecular Biology     | 11                      |
| Immunology                           | 10                      |
| Infectious Diseases                  | 5                       |
| Chemistry, Multidisciplinary         | 6                       |
| Agriculture, Multidisciplinary       | 4                       |
| Pharmacology & Pharmacy              | 4                       |
| Chemistry, Applied                   | 4                       |
| Biotechnology & Applied Microbiology | 3                       |
| Endocrinology & Metabolism           | 3                       |
| Genetics & Heredity                  | 3                       |
| Oncology                             | 3                       |
| Biology                              | 1                       |
| Biophysics                           | 1                       |
| Cell Biology                         | 1                       |
| Chemistry, Analytical                | 1                       |
| Chemistry, Medicinal                 | 1                       |
| Chemistry, Organic                   | 1                       |
| Chemistry, Physical                  | 1                       |
| Ecology                              | 1                       |
| Marine & Freshwater Biology          | 1                       |
| Materials Science, Biomaterials      | 1                       |
| Medicine, Research & Experimental    | 1                       |
| Mycology                             | 1                       |
| Parasitology                         | 1                       |
| Physiology                           | 1                       |
| Polymer Science                      | 1                       |
| Tropical Medicine                    | 1                       |
| Virology                             | 1                       |

**Figure S8.** Venn diagrams of three pairs of authors, affiliated with scientific establishments in three different countries, with number of published papers in which they were first or last authors (descriptors of authors not corresponding to their names).

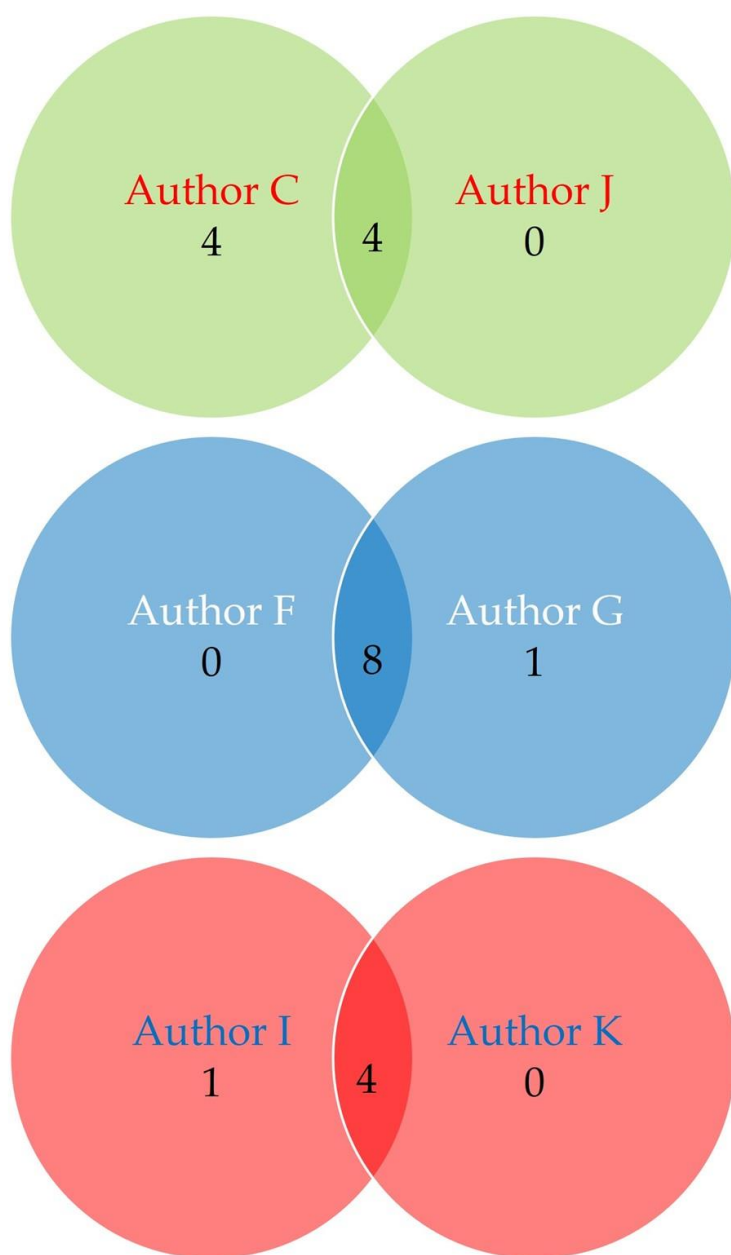

**Table S20.** Median (interquartile range) number of authors per published paper on mastitis and proteomics, in accord with countries of origin of the papers.

| Country                  | Median (interquartile range) number of authors in published papers |
|--------------------------|--------------------------------------------------------------------|
| Brazil                   | 8 (1.5)                                                            |
| Canada                   | 4.5 (1.8)                                                          |
| China                    | 8 (4)                                                              |
| Croatia                  | 12 (4)                                                             |
| Denmark                  | 6 (1)                                                              |
| France                   | 9 (8)                                                              |
| Germany                  | 4.5 (2.5)                                                          |
| Greece                   | 8.5 (3.3)                                                          |
| Italy                    | 9 (3)                                                              |
| Spain                    | 8 (2)                                                              |
| United Kingdom           | 6 (3)                                                              |
| United States of America | 4 (4.3)                                                            |

**Table S21.** Median (interquartile range) number of yearly citations received by published papers on mastitis and proteomics, in accord with countries of origin of papers.

| Country                  | Median (interquartile range) number of citations received by published papers |
|--------------------------|-------------------------------------------------------------------------------|
| Argentina                | 0.8 (0.0)                                                                     |
| Australia                | 8.3 (0.0)                                                                     |
| Brazil                   | 0.7 (1.1)                                                                     |
| Canada                   | 2.9 (2.0)                                                                     |
| China                    | 1.6 (1.6)                                                                     |
| Colombia                 | 0.3 (0.3)                                                                     |
| Croatia                  | 6.8 (7.1)                                                                     |
| Czech Republic           | 4.5 (0.0)                                                                     |
| Denmark                  | 4.0 (1.6)                                                                     |
| Egypt                    | 1.8 (0.0)                                                                     |
| Finland                  | 1.6 (0.0)                                                                     |
| France                   | 2.6 (2.0)                                                                     |
| Germany                  | 2.2 (2.0)                                                                     |
| Greece                   | 0.7 (1.7)                                                                     |
| Hungary                  | 0.5 (0.0)                                                                     |
| India                    | 3.7 (1.0)                                                                     |
| Ireland                  | 2.2 (0.3)                                                                     |
| Italy                    | 2.8 (2.5)                                                                     |
| Japan                    | 1.2 (0.0)                                                                     |
| Korea                    | 1.1 (0.0)                                                                     |
| New Zealand              | 3.1 (3.8)                                                                     |
| Norway                   | 0.0 (0.0)                                                                     |
| Pakistan                 | 9.3 (0.0)                                                                     |
| Poland                   | 2.7 (0.0)                                                                     |
| Portugal                 | 5.3 (3.0)                                                                     |
| Russia                   | 3.3 (0.0)                                                                     |
| Saudi Arabia             | 1.2 (0.0)                                                                     |
| Spain                    | 2.6 (2.2)                                                                     |
| Thailand                 | 1.3 (0.0)                                                                     |
| The Netherlands          | 2.5 (0.3)                                                                     |
| Turkey                   | 1.3 (0.0)                                                                     |
| United Kingdom           | 2.8 (4.4)                                                                     |
| United States of America | 2.7 (1.2)                                                                     |

**Table S22.** Statistical significance of evaluation for potential association of variables of paper content with yearly number of citations.

| Paper details                            | <i>p</i> |
|------------------------------------------|----------|
| Mammalian species                        | 0.39     |
| Mastitis aspect                          | 0.22     |
| Type of work                             | 0.14     |
| Material assessed                        | 0.23     |
| Proteomics technologies employed         | 0.44     |
| Additional -omics technologies described | 0.08     |
